# Supplementary material for: Prediction of Lymph-Node Metastasis in Cancers Using Differentially Expressed mRNA and Non-coding RNA Signatures
Source: Front Cell Dev Biol. 2021 Feb 11;9:605977. doi: 10.3389/fcell.2021.605977 (PMC7905047; doi:10.3389/fcell.2021.605977)
Supplement: Supplementary file 2 [file Table_2.XLSX]

## Sheet: mRNA profile
	SVM classifiers		KNN classifiers		RF classifiers
	Training_Acc	Testing_Acc	Training_Acc	Testing_Acc	Training_Acc	Testing_Acc
Bladder urothelial carcinoma (BLCA)	0.8929	0.7708	0.8929	0.7708	0.9911	0.7708
Breast invasive carcinoma (BRCA)	0.7981	0.6796	0.8005	0.6906	0.8575	0.674
Cervical and endocervical cancers (CESC)	0.7027	0.8485	1	0.6364	0.9595	0.8182
Colon adenocarcinoma (COAD)	0.8485	0.8706	0.8434	0.8706	0.8586	0.8706
Kidney renal clear cell carcinoma (KIRC)	0.9865	0.9219	0.9595	0.9219	1	0.9219
Lung adenocarcinoma (LUAD)	0.8081	0.8488	0.8485	0.814	0.9798	0.7907
Lung squamouscell carcinoma (LUSC)	0.8708	0.9	0.8708	0.8889	0.9569	0.9111
Pancreatic adenocarcinoma (PAAD)	0.7593	0.75	0.7593	0.75	0.963	0.8333
Rectum adenocarcinoma (READ)	0.8806	0.7	0.9104	0.7	0.9552	0.7
Average Accuracy	0.8386	0.81	0.876144	0.782578	0.946844	0.810067
Acc, Accuracy; Support Vector Machine, SVM; KNN, K-Nearest Neighbor; RF, Random Forest

## Sheet: miRNA profile
	SVM classifiers		KNN classifiers		RF classifiers
	Training_Acc	Testing_Acc	Training_Acc	Testing_Acc	Training_Acc	Testing_Acc
Bladder urothelial carcinoma (BLCA)	1	0.7755	0.8938	0.8163	0.9912	0.7551
Breast invasive carcinoma (BRCA)	0.7639	0.7374	0.7783	0.7374	0.7711	0.743
Cervical and endocervical cancers (CESC)	0.7162	0.8182	0.8108	0.8182	0.8919	0.8485
Colon adenocarcinoma (COAD)	0.9016	0.8861	0.8415	0.8861	0.9508	0.8608
Kidney renal clear cell carcinoma (KIRC)	0.9524	0.9524	0.9456	0.9524	0.9864	0.9524
Lung adenocarcinoma (LUAD)	0.8848	0.7952	0.8325	0.7711	0.9476	0.7711
Lung squamouscell carcinoma (LUSC)	0.9388	0.8471	0.8673	0.8353	0.9183	0.8588
Pancreatic adenocarcinoma (PAAD)	0.8	0.7083	0.7455	0.75	0.9273	0.7083
Rectum adenocarcinoma (READ)	0.9231	0.8571	0.8308	0.8214	0.9846	0.8214
Average Accuracy	0.8756	0.8197	0.838456	0.820911	0.929911	0.813267
Acc, Accuracy; Support Vector Machine, SVM; KNN, K-Nearest Neighbor; RF, Random Forest

## Sheet: lncRNA profile
	SVM classifiers		KNN classifiers		RF classifiers
	Training_Acc	Testing_Acc	Training_Acc	Testing_Acc	Training_Acc	Testing_Acc
Bladder urothelial carcinoma (BLCA)	0.8839	0.8125	0.8571	0.8125	0.9375	0.7292
Breast invasive carcinoma (BRCA)	0.7933	0.6961	0.8005	0.6906	0.8052	0.6961
Cervical and endocervical cancers (CESC)	0.7027	0.8485	0.6757	0.8485	0.8784	0.8182
Colon adenocarcinoma (COAD)	0.8687	0.8706	0.8586	0.8235	0.9545	0.8353
Kidney renal clear cell carcinoma (KIRC)	0.973	0.8438	0.973	0.9063	0.9932	0.875
Lung adenocarcinoma (LUAD)	0.798	0.8488	0.798	0.8488	0.9394	0.8023
Lung squamouscell carcinoma (LUSC)	0.8612	0.9	0.8565	0.8889	0.8756	0.8889
Pancreatic adenocarcinoma (PAAD)	0.7593	0.75	0.7222	0.7083	0.9259	0.7083
Rectum adenocarcinoma (READ)	0.8657	0.7	0.9104	0.7333	0.9851	0.7
Average Accuracy	0.834	0.8078	0.828	0.806744	0.921644	0.7837
Acc, Accuracy; Support Vector Machine, SVM; KNN, K-Nearest Neighbor; RF, Random Forest
